# Supplementary material for: A Source Model for Volcanic Explosions and its Influence on Lamb Wave Wavelengths: Insights from the 2022 Hunga Tonga Eruption
Source: Research Square preprint supplement (doi:10.21203/rs.3.rs-5416432/v1), 2024-11-27
Supplement: Supplementary file 1 [file f04a9afb3d19cc3443c5d0af.xlsx]

## Sheet: true
Station Code	Station Name	Latitude	Longitude	P, Pa	tau, s	R, km
AAE	Addis Ababa, Ethiopia	9.0292	38.7656				NOFILE				Color meaning
AAE1	Addis Ababa, Ethiopia	9.0292	38.7656				NOFILE				no data for the required time period	Station excluded	High noise-to-signal ratio	wave parameters can be determined precisely
ADK	Adak, Aleutian Islands, Alaska	51.8823	-176.6842	196	1696	8032	OK
AFI	Afiamalu, Samoa	-13.9085	-171.7827	985	2586	836	OK
ANMO	Albuquerque, New Mexico, USA	34.9459	-106.4572	137	3348	8483	OK
ANTO	Ankara, Turkey	39.868	32.7934	608	3958	13033	OK	STRANGE VALUE
BBSR	Bermuda Institute of Ocean Sciences, St George's Bermuda	32.371299	-64.696299	113	1790	11188	BADSIGNAL	RESAMPLING X10
BILL	Bilibino, Russia	68.0653	166.4531				NOFILE
BOCO	Bogota, Colombia	5869-04-01	-74.0432				NOFILE
CASY	Casey, Antarctica	-66.2792	110.5354	344	8631	8927	OK	STRANGE VALUE
CCM	Cathedral Cave, Missouri, USA	38.0557	-91.2446				BADSIGNAL	NO VISIBLE SIGNAL
CHTO	Chiang Mai, Thailand	18.8141	98.9443	291	4062	9750	OK
COL	College Outpost, Alaska, USA	64.8993	-147.7954				NOFILE
COLA	College Outpost, Alaska, USA	64.873599	-147.8616	308	1821	9304	OK
COR	Corvallis, Oregon, USA	44.5855	-123.3046	225	2586	8084	OK
CTAO	Charters Towers, Australia	-20.0882	146.2545	406	4100	4265	BADSIGNAL	RESAMPLING X100
DAV	Davao, Philippines	7.0697	125.5791	343	4061	7044	OK
DWPF	Disney Wilderness Preserve, Florida, USA	28.1103	-81.4327	182	1983	10126	OK
FUNA	Funafuti, Tuvalu	-8.5259	179.1966	841	2364	1465	OK
FURI	Mt. Furi, Ethiopia	8952-08-01	38.6798				NOFILE
GNI	Garni, Armenia	40.148	44.741	294	4213	12650	OK
GRFO	Grafenberg, Germany	49.6909	2022-11-01				NOFILE
GUMO	Guam, Mariana Islands	13.5893	144.8684	325	6721	5677	BADSIGNAL	INTERPRETATION: 2000? 6000?
HKT	Hockley, Texas	29.9618	-95.8384				BADSIGNAL	NO VISIBLE SIGNAL
HNR	Honiara, Solomon Islands	-9.4387	159.9475	546	3287	2999	OK
HRV	Adam Dziewonski Observatory (Oak Ridge), Massachusetts, USA	42.5064	-71.5583				BADSIGNAL	NO VISIBLE SIGNAL
INCN	Inchon, Republic of Korea	37.4776	126.6239	256	2179	8395	OK
JOHN	Johnston Island, USA	16.7329	-169.5292	388	1866	4157	OK
KBL	Kabul, Afghanistan	34.5408	69.0432				NOFILE
KBS	Ny-Alesund, Spitzbergen, Norway	78.9154	9385-11-01				NOFILE
KEV	Kevo, Finland	69.7565	27.0035	246	2810	10210	OK
KIEV	Kiev, Ukraine	50.7012	29.2242	226	1791	12075	OK
KIP	Kipapa, Hawaii, USA	21.42	-158.0112	226	1316	4911	OK
KMBO	Kilima Mbogo, Kenya	-1.1271	37.2525	227	2489	15882	OK
KNTN	Kanton, Kiritibati	-2.7744	-171.7186				NOFILE
KONO	Kongsberg, Norway	59.6491	5982-09-01	177	2443	11166	OK
KOWA	Kowa, Mali	14.4967	-4.014				NOFILE
LCO	Las Campanas Astronomical Observatory, Chile	-29.011	-70.7004	220	1972	11617	OK
LSZ	Lusaka, Zambia	-15.2779	28.1882				NOFILE
LVC	Limon Verde, Chile	-22.6127	-68.9111				NOFILE
MA2	Magadan, Russia	59.5756	150.77				NOFILE
MACI	Morro de la Arena, Canary Islands	28.2502	-16.508199				NOFILE
MAJO	Matsushiro, Japan	36.54567	138.20406	244	2907	7728	OK
MAKZ	Makanchi, Kazakhstan	46.808	81.977				NOFILE
MBWA	Marble Bar, Western Australia	-21.159	119.7313				NOFILE
MIDW	Midway Island, USA	28.2156	-177.3698	258	2215	5415	OK
MSKU	Masuku, Gabon	-1.6557	13.6116				NOFILE
NAI	Nairobi, Kenya	-1.2739	36.8037				NOFILE
NWAO	(GSN) IRIS/USGS (IU) and Geoscience Australia	-32.9277	117.239	249	2204	7564	BADSIGNAL	INTERPRETATION: 2000? 5000?
OTAV	Otavalo, Ecuador	0.2376	-78.4508	231	2046	10696	OK
PAB	San Pablo, Spain	39.5446	-4.3499				BADSIGNAL	NO VISIBLE SIGNAL
PAYG	Puerto Ayora, Galapagos Islands	-0.6742	-90.2861	214	4135	9465	OK
PET	Petropavlovsk, Russia	53.0233	158.6499				NOFILE
PMG	Port Moresby, New Guinea	-9.4047	147.1597	433	4250	4327	BADSIGNAL	INTERPRETATION: 4000? 800?
PMSA	Palmer Station, Antarctica	-64.7744	-64.0489	234	1997	11554	OK
POHA	Pohakuloa, Hawaii, USA	19.7573	-155.5326	209	1800	4839	BADSIGNAL	RESAMPLING X100
PTCN	Pitcairn Island, South Pacific	-25.0713	-130.0953	351	1894	5054	OK
PTGA	Pitinga, Brazil	-0.7308	-59.9666				NOFILE
QSPA	South Pole Remote Earth Science Observatory (Quiet Zone)	-89.9289	144.4382	212	2000	8471	BADSIGNAL	RESAMPLING X100
RAIO	Rainier, Oregon, USA	46.0403	-122.8851				NOFILE
RAO	Raoul, Kermadec Islands	-29.245	-177.929				NOFILE
RAR	Rarotonga, Cook Islands	-21.2125	-159.7733	700	1902	1738	OK
RCBR	Riachuelo, Brazil	-5.8274	-35.9014	188	1821	15256	OK
RSSD	Black Hills, South Dakota, USA	44.1212	-104.0359	207	2043	8846	OK
SAML	Samuel, Brazil	-8.9489	-63.1831				NOFILE
SBA	Scott Base, Antarctica	-77.8492	166.7572	272	1971	6630	BADSIGNAL	NOISE
SDV	Santo Domingo, Venezuela	8839-08-01	-70.634				NOFILE
SEO	Seoul, South Korea	37.5667	126.9667				NOFILE
SFJ	Sondre Stromfjord, Greenland	66.9967	-50.6156				NOFILE
SFJD	Sondre Stromfjord, Greenland	66.9961	-50.62076	112	3100	9785	BADSIGNAL	STRANGE SIGNAL, RESAMPLING X100
SJG	San Juan, Puerto Rico	18.1091	-66.15	226	2704	11560	OK
SLBS	Sierra la Laguna Baja California Sur, Mexico	23.6858	-109.9443				NOFILE
SNZO	South Karori, New Zealand	-41.3087	174.7043	611	4328	2555	OK
SPA	South Pole, Antarctica	-89.9954	115				NOFILE
SSPA	Standing Stone, Pennsylvania	40.6358	-77.8876				BADSIGNAL	NO VISIBLE SIGNAL
TARA	Tarawa Island, Republic of Kiribati	3549-01-01	172.9229	449	4148	2756	BADSIGNAL	INTERPRETATION: 4000? 1200?
TATO	Taipei, Taiwan	24.9735	121.4971	222	2154	8090	OK
TBT	Taburiente, Canary Islands, Spain	28.6794	-17.9145				NOFILE
TEIG	Tepich, Yucatan, Mexico	20.2263	-88.2763	271	1980	9640	OK
TIXI	Tiksi, Russia	71.6341	128.8667				NOFILE
TOL	Toledo, Spain	39.8814	-4.048499				NOFILE
TRIS	Tristan da Cunha	-37.0681	-12.3152				NOFILE
TRQA	Tornquist, Argentina	-38.0568	-61.9787	109	1889	12461	BADSIGNAL	STRANGE STRUCTURE AT THE END
TSUM	Tsumeb, Namibia	-19.2022	17.5838	144	2262	18565	BADSIGNAL	INTERPRETATION
TUC	Tucson, Arizona	32.3098	-110.7847	140	3318	8172	BADSIGNAL	INTERPRETATION
ULN	Ulaanbaatar, Mongolia	47.8651	107.0532	235	2911	9811	OK
WAKE	Wake Island	19.2834	166.652	332	1977	4829	OK
WCI	Wyandotte Cave, Indiana, USA	38.2289	-86.2939				BADSIGNAL	NO VISIBLE SIGNAL
WVT	Waverly, Tennessee, USA	36.1297	-87.83				BADSIGNAL	NO VISIBLE SIGNAL
XMAS	Kiritimati Island, Republic of Kiribati	2.0448	-157.4457	394	3956	3144	OK
YAK	Yakutsk, Russia	62.031	129.6805				NOFILE
YSS	Yuzhno Sakhalinsk, Russia	46.9587	142.7604				NOFILE
